# Supplementary material
Source: Copernicus journal article supplement (doi:10.5194/bg-23-2787-2026)
Supplement: Supplementary file 1 [file bg-23-2787-2026-supplement.pdf]

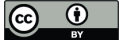

*Supplement of*

**Nitrous oxide emissions from pigeon pea–maize rotation in response to conservation agriculture and biochar amendments in a Ferralsol, northern Uganda**

**Talent Namatsheve et al.**

*Correspondence to:* Talent Namatsheve ([talent.namatsheve@slu.se](mailto:talent.namatsheve@slu.se), [namatshevetalent@gmail.com](mailto:namatshevetalent@gmail.com))

The copyright of individual parts of the supplement might differ from the article licence.

27 Table S1: Soil and biochar properties. This is based on the background soil sampling (0-20 cm)  
 28 taken in March 2023 for site characterisation. Soil pH was determined in a 2.5:1 water to soil  
 29 suspension (Gee and Bauder, 1986). Soil C, N and  $\delta^{15}\text{N}$  were determined by Elemental  
 30 Analysis-Isotope Ratio Mass Spectrometry (EA-IRMS). Plant available P, calcium (Ca), iron  
 31 (Fe), potassium (K), magnesium (Mg) and zinc (Zn) were analysed using ICP-OES after  
 32 extraction from soil with ammonium lactate (2 g of soil into 40 ml of P-AL) as described by  
 33 Egner et al. (1960).

| Parameters                          | Gulu       | Biochar |
|-------------------------------------|------------|---------|
| pH                                  | 6.71       | 9.74    |
| TOC (%)                             | 1.52       | 50.90   |
| N (%)                               | 0.11       | 0.76    |
| C/N                                 | 13.82      | 67.30   |
| Available P ( $\text{mg kg}^{-1}$ ) | 6          | 710     |
| Ca ( $\text{mg kg}^{-1}$ )          | 620        | 10133   |
| Fe ( $\text{mg kg}^{-1}$ )          | 56         | 217     |
| K ( $\text{mg kg}^{-1}$ )           | 210        | 13000   |
| Mg ( $\text{mg kg}^{-1}$ )          | 120        | 1500    |
| Zn ( $\text{mg kg}^{-1}$ )          | 1.1        | 8.53    |
| Clay %                              | 4          |         |
| Silt %                              | 16         |         |
| Sand %                              | 80         |         |
| Texture                             | loamy sand |         |

34 Namatsheve et al. (2025)

35

36

37

38 Table S2: Model selection and summary statistics of ANOVA for effect of treatments on hourly  
 39 N<sub>2</sub>O fluxes (μg m<sup>2</sup> h<sup>-1</sup>). Variance and standard deviation (SD) are shown for the random effect  
 40 and chi-square (χ<sup>2</sup>), degrees of freedom (df) and significance (P-value) are shown for the fixed  
 41 effects

| Models                                                                                | AIC           | BIC           |
|---------------------------------------------------------------------------------------|---------------|---------------|
| mod1: N2Oflux ~ treatment × season × position + (1   block) + (1   chamber_ID)        | 4564.6        | 4646.3        |
| <b>mod2: N2Oflux ~ treatment + season + position + (1   block) + (1   chamber_ID)</b> | <b>4558.8</b> | <b>4593.2</b> |

| Random effects | Variance | SD     |
|----------------|----------|--------|
| Chamber ID     | 0        | 0      |
| Block          | 0        | 0      |
| Residual       | 247.48   | 15.732 |

| Fixed effects | χ <sup>2</sup> | df | P-value |
|---------------|----------------|----|---------|
| Treatment     | 11.261         | 3  | 0.010   |
| Season        | 3.460          | 1  | 0.063   |
| Position      | 0.855          | 1  | 0.355   |

42  $Y_{ijk} = \beta_0 + \beta_1 \cdot \text{treatment}_{ij} + \beta_2 \cdot \text{season}_{ij} + \beta_3 \cdot \text{position}_{ij} + u_k + v_j + \epsilon_{ijk}$

43

44

45 Table S3: Model selection and summary statistics of ANOVA on effect of treatments on nitrate  
 46 (mg kg<sup>-1</sup>). Variance and standard deviation (SD) are shown for the random effect and chi-square  
 47 (χ<sup>2</sup>), degrees of freedom (df) and significance (P-value) are shown for the fixed effects. Results  
 48 are presented in Fig 2c, d.

| Models                                                                                | AIC            | BIC            |
|---------------------------------------------------------------------------------------|----------------|----------------|
| mod1: nitrate ~ treatment × season × position + (1   block) + (1   chamber_ID)        | 3188.39        | 3269.75        |
| <b>mod2: nitrate ~ treatment + season + position + (1   block) + (1   chamber_ID)</b> | <b>3173.95</b> | <b>3212.21</b> |

| Random effects | Variance | SD    |
|----------------|----------|-------|
| Chamber ID     | 0        | 0.000 |
| Block          | 0        | 0.000 |
| Residual       | 21.351   | 4.620 |

| Fixed effects | χ <sup>2</sup> | df | P-value |
|---------------|----------------|----|---------|
| Treatment     | 4.742          | 3  | 0.192   |
| Season        | 4.833          | 1  | 0.028   |
| Position      | 0.027          | 1  | 0.871   |

49  $Y_{ijk} = \beta_0 + \beta_1 \cdot \text{treatment}_{ij} + \beta_2 \cdot \text{season}_{ij} + \beta_3 \cdot \text{position}_{ij} + u_k + v_j + \epsilon_{ijk}$

50 Table S4: Model selection and summary statistics of ANOVA on treatments on ammonium (mg  
 51 kg<sup>-1</sup>). Variance and standard deviation (SD) are shown for the random effect and chi-square  
 52 ( $\chi^2$ ), degrees of freedom (df) and significance (P-value) are shown for the fixed effects. Results  
 53 are presented in Fig 3a.

| Models                                                                                 | AIC           | BIC           |
|----------------------------------------------------------------------------------------|---------------|---------------|
| mod1: ammonium ~ treatment × season × position + (1   block) + (1   chamber_ID)        | 5142.6        | 5224.0        |
| <b>mod2: ammonium ~ treatment + season + position + (1   block) + (1   chamber_ID)</b> | <b>5127.5</b> | <b>5161.7</b> |

| Random effects | Variance | SD    |
|----------------|----------|-------|
| Chamber ID     | 0        | 0     |
| Block          | 7.062    | 2.657 |
| Residual       | 819.64   | 28.63 |

| Fixed effects | $\chi^2$ | df | P-value |
|---------------|----------|----|---------|
| Treatment     | 9.694    | 3  | 0.021   |
| Season        | 7.900    | 1  | 0.004   |
| Position      | 0.916    | 1  | 0.338   |

54  $Y_{ijk} = \beta_0 + \beta_1 \cdot \text{treatment}_{ij} + \beta_2 \cdot \text{season}_{ij} + \beta_3 \cdot \text{position}_{ij} + u_k + v_j + \epsilon_{ijk}$

55

56 Table S5: Model selection and summary statistics of ANOVA on effect of total mineral N on  
 57 N2O. Variance and standard deviation (SD) are shown for the random effect and chi-square  
 58 ( $\chi^2$ ), degrees of freedom (df) and significance (P-value) are shown for the fixed effects. Results  
 59 are presented in Fig 4.

| Models                                                                             | AIC           | BIC           |
|------------------------------------------------------------------------------------|---------------|---------------|
| mod1: totalN~ treatment × season × position + (1   block) + (1   chamber_ID)       | 5098.5        | 5179.9        |
| <b>mod2: totalN ~ treatment + season (1   block) + position + (1   chamber_ID)</b> | <b>5083.8</b> | <b>5118.1</b> |

| Random effects | Variance | SD     |
|----------------|----------|--------|
| Chamber ID     | 0        | 0      |
| Block          | 6.94     | 2.635  |
| Residual       | 755.14   | 27.480 |

| Fixed effects | $\chi^2$ | df | P-value |
|---------------|----------|----|---------|
| Treatment     | 8.643    | 3  | 0.034   |
| Season        | 10.805   | 1  | 0.001   |
| Position      | 0.942    | 1  | 0.332   |

60  $Y_{ijk} = \beta_0 + \beta_1 \cdot \text{treatment}_{ij} + \beta_2 \cdot \text{season}_{ij} + \beta_3 \cdot \text{position}_{ij} + u_k + v_j + \epsilon_{ijk}$

61 Table S6: Model selection and summary statistics of ANOVA on effect of WFPS on N<sub>2</sub>O.  
 62 Variance and standard deviation (SD) are shown for the random effect and chi-square ( $\chi^2$ ),  
 63 degrees of freedom (df) and significance (P-value) are shown for the fixed effects. Results are  
 64 presented in Fig 4.

| Models                                                                             | AIC           | BIC           |
|------------------------------------------------------------------------------------|---------------|---------------|
| mod1: WFPS ~ treatment × season × position + (1   block) + (1   chamber_ID)        | 4764.6        | 4785.0        |
| <b>mod2: WFPS ~ treatment + season + position + (1   block) + (1   chamber_ID)</b> | <b>4746.3</b> | <b>4846.3</b> |

| Random effects | Variance | SD     |
|----------------|----------|--------|
| Chamber ID     | 0        | 0      |
| Block          | 0.296    | 0.544  |
| Residual       | 348.317  | 18.663 |

| Fixed effects | $\chi^2$ | df | P-value |
|---------------|----------|----|---------|
| Treatment     | 3.498    | 3  | 0.321   |
| Season        | 12.807   | 1  | 0.0003  |
| Position      | 0.447    |    | 0.504   |

65  $Y_{ijk} = \beta_0 + \beta_1 \cdot \text{treatment}_{ij} + \beta_2 \cdot \text{season}_{ij} + \beta_3 \cdot \text{position}_{ij} + u_k + v_j + \epsilon_{ijk}$

66

67

68 Table S7: Model selection and summary statistics of ANOVA for effect of treatments on  
 69 cumulative N<sub>2</sub>O emissions (kg N<sub>2</sub>O-N ha<sup>-1</sup>). Variance and standard deviation (SD) are shown  
 70 for the random effect and chi-square ( $\chi^2$ ), degrees of freedom (df) and significance (P-value)  
 71 are shown for the fixed effects. Results are presented in Fig 3a, 3b, S3.

| Models                                                          | AIC            | BIC            |
|-----------------------------------------------------------------|----------------|----------------|
| mod1: cumN2O ~ treatment × season × position + (1   block)      | -30.766        | 8.093          |
| <b>mod2: cumN2O ~ treatment + season + position (1   block)</b> | <b>-37.688</b> | <b>-20.417</b> |

| Random effects | Variance | SD    |
|----------------|----------|-------|
| Block          | 0.000    | 0.029 |
| Residual       | 0.021    | 0.145 |

| Fixed effects | $\chi^2$ | df | P-value |
|---------------|----------|----|---------|
| Treatment     | 22.320   | 3  | <0.0001 |
| Season        | 5.536    | 1  | 0.019   |
| Position      | 1.541    | 1  | 0.463   |

72  $Y_{ijk} = \beta_0 + \beta_1 \cdot \text{treatment}_{ij} + \beta_2 \cdot \text{season}_{ij} + \beta_3 \cdot \text{position}_{ij} + u_k + v_j + \epsilon_{ijk}$

73 Table S8: Model selection and summary statistics of ANOVA for effect of treatments on scaled  
 74 N2O emissions (kg N<sub>2</sub>O-N ha<sup>-1</sup>) for both seasons. Variance and standard deviation (SD) are  
 75 shown for the random effect and chi-square ( $\chi^2$ ), degrees of freedom (df) and significance (P-  
 76 value) are shown for the fixed effects. Results are presented in Fig 3c, S3c.

| Models                                                                  | AIC            | BIC             |
|-------------------------------------------------------------------------|----------------|-----------------|
| mod1: cumN2Oscaled ~ treatment × season × position + (1   block)        | -135.42        | -68.744         |
| <b>mod2: cumN2Oscaled ~ treatment + season + position + (1   block)</b> | <b>-146.38</b> | <b>-123.303</b> |

| Random effects | Variance | SD    |
|----------------|----------|-------|
| Block          | 0.000    | 0.021 |
| Residual       | 0.010    | 0.101 |

| Fixed effects | $\chi^2$ | df | P-value |
|---------------|----------|----|---------|
| Treatment     | 23.901   | 3  | <0.0001 |
| Season        | 3.873    | 1  | 0.049   |
| Position      | 82.402   |    | <0.0001 |

77  $Y_{ijk} = \beta_0 + \beta_1 \cdot \text{treatment}_{ij} + \beta_2 \cdot \text{season}_{ij} + \beta_3 \cdot \text{position}_{ij} + u_k + v_j + \epsilon_{ijk}$

78

79 Chamber positions

80

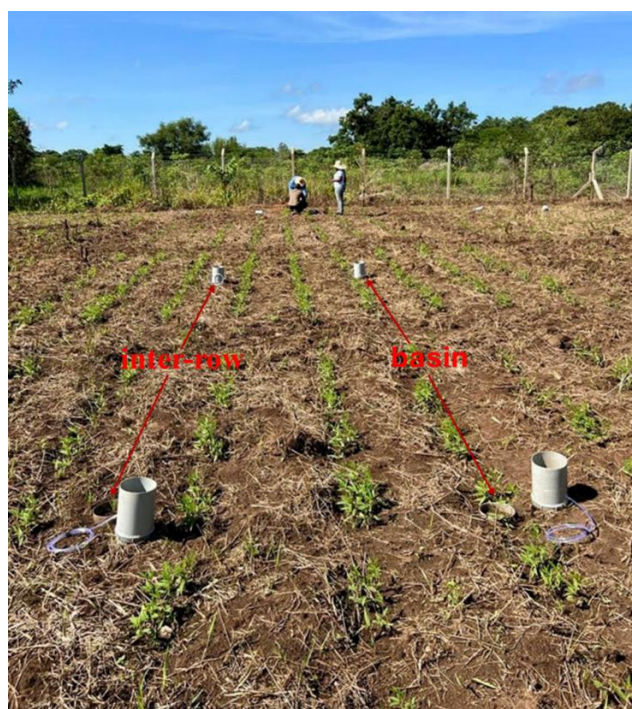

81

82 Fig S1: Fig chamber position between rows and in a basin, during the first season with pigeon  
 83 pea on 11 May 2023.

84

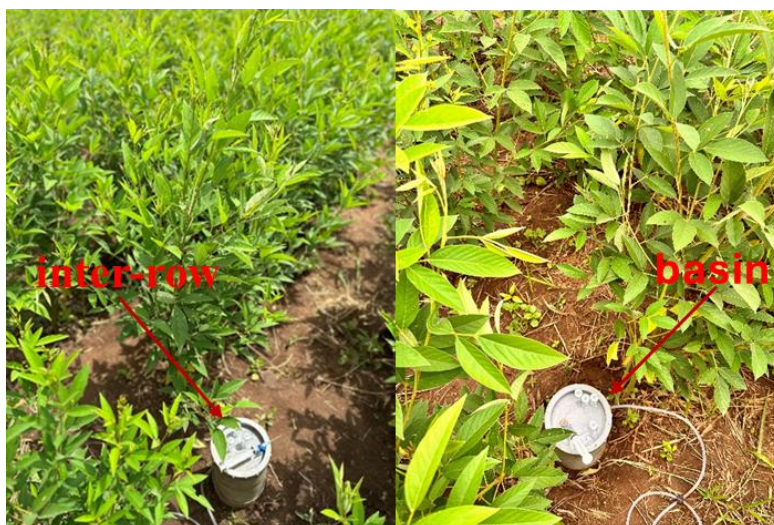

85

86

87 Fig S2: Chamber position between rows and in a basin, during the first season with pigeon  
88 pea on 14 July 2023.

89

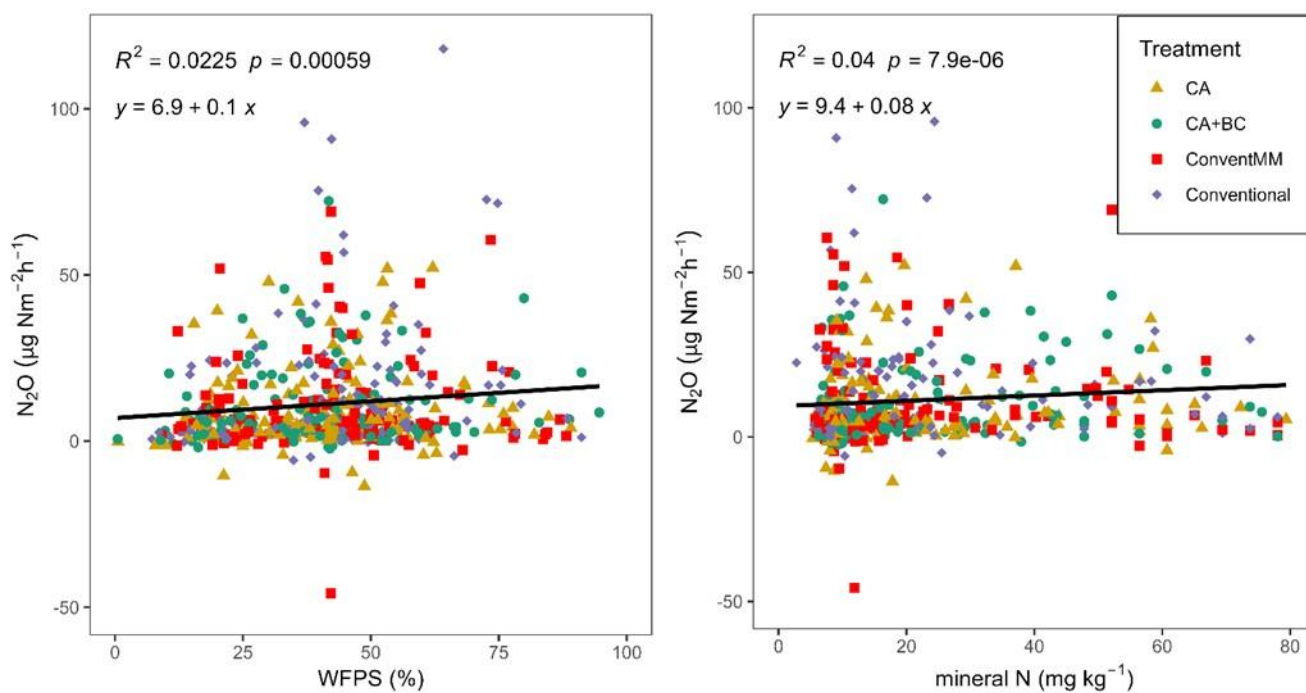

90

91 Fig S3: Relationship between hourly  $N_2O$  fluxes and water filled pore space (WFPS) and  
92 mineral N ( $mg\ kg^{-1}$ ) in Gulu. Data points are for 17 sampling dates.

93

94
